# Supplementary material for: Extent of Left Ventricular Mass Regression and Impact of Global Left Ventricular Afterload on Cardiac Events and Mortality after Aortic Valve Replacement
Source: MDPI journal article supplement (doi:10.3390/jcm11247482), 2022-12-16
Supplement: s1 [file s1]

**Supplemental Table S1.** Detailed description of the size and brand for the implanted valves

| Variable                           | Number (Frequency %) |
|------------------------------------|----------------------|
| Valve size (n = 95)                |                      |
| 19mm                               | 3(2.5)               |
| 21mm                               | 39(32.5)             |
| 23mm                               | 38(31.7)             |
| 25mm                               | 13(10.8)             |
| 27mm                               | 2(1.7)               |
| Valve size for sutureless (n = 25) |                      |
| S                                  | 8(6.7)               |
| M                                  | 9(7.5)               |
| L                                  | 5(4.2)               |
| XL                                 | 3(2.5)               |
| Brand                              |                      |
| EPIC (porcine)                     | 13(10.8)             |
| Hancock (porcine)                  | 35(29.2)             |
| Mitroflow (bovine)                 | 27(22.5)             |
| Perimount (bovine)                 | 9(7.5)               |
| Magna (bovine)                     | 8(6.7)               |
| Perceval (sutureless)              | 25(20.8)             |
| St Jude Standard (mechanical)      | 1(0.8)               |
| St Jude Regeant (mechanical)       | 2(1.7)               |
